# Supplementary material for: Nanoparticles based on glycyrrhetinic acid modified porphyrin for photodynamic therapy of cancer
Source: Royal Society of Chemistry journal article supplement (doi:10.1039/c7ob03108d), 2018-01-01
Supplement: c7ob03108d1.pdf [file c7ob03108d1.pdf]

## Supporting Information

### **Nanoparticles based on glycyrrhetic acid modified porphyrin for photodynamic therapy of cancer**

Xin Wang,<sup>a,b</sup> Peisong Wang,<sup>a</sup> Shuai Xue,<sup>a</sup> Xiaohua Zheng,<sup>b,c</sup> Zhigang Xie,<sup>b</sup> Guang Chen<sup>\*a</sup> and Tingting Sun<sup>\*b,c</sup>

<sup>a</sup> Department of Thyroid Surgery, The First Hospital of Jilin University, 71 Xinmin Street, Changchun, Jilin 130021, P. R. China. E-mail: cg9293@sina.com

<sup>b</sup> State Key Laboratory of Polymer Physics and Chemistry, Changchun Institute of Applied Chemistry, Chinese Academy of Sciences, 5625 Renmin Street, Changchun, Jilin 130022, P. R. China. E-mail: suntt@ciac.ac.cn

<sup>c</sup> University of Chinese Academy of Sciences, Beijing 100049, P. R. China

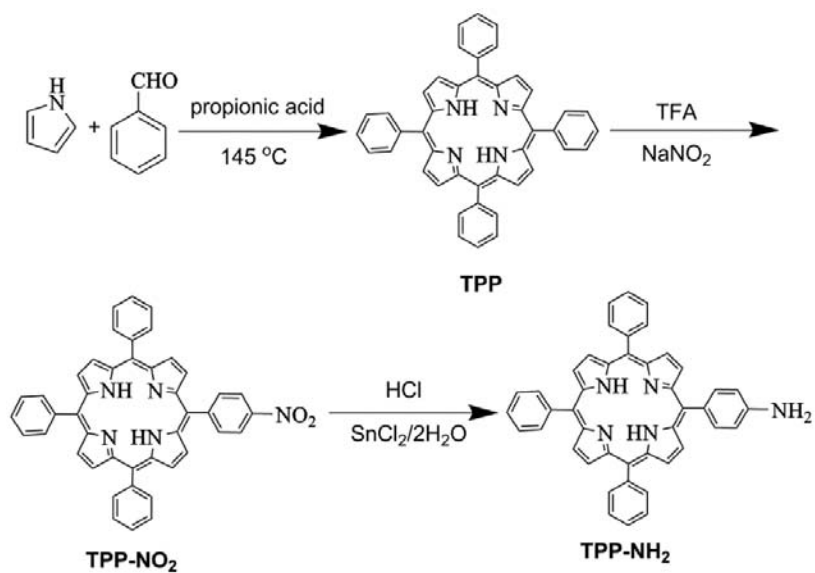

**Fig. S1** Synthesis of TPP-NH<sub>2</sub>.

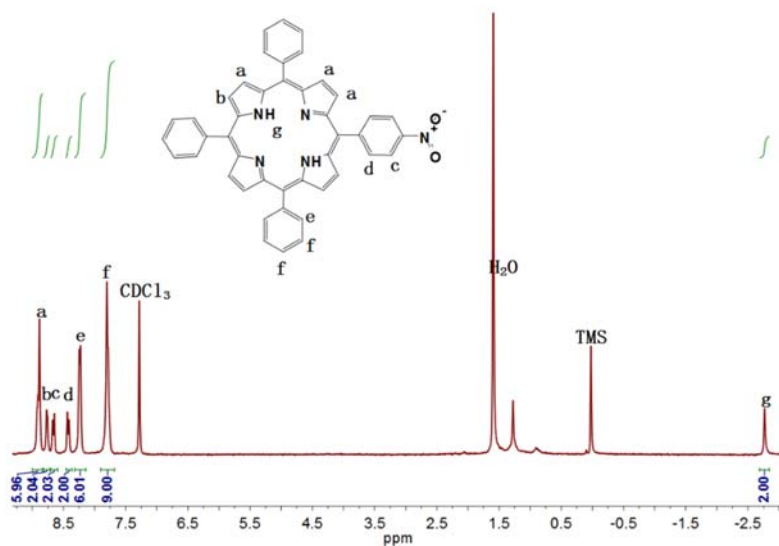

**Fig. S2** <sup>1</sup>H NMR spectrum of TPP-NO<sub>2</sub>.

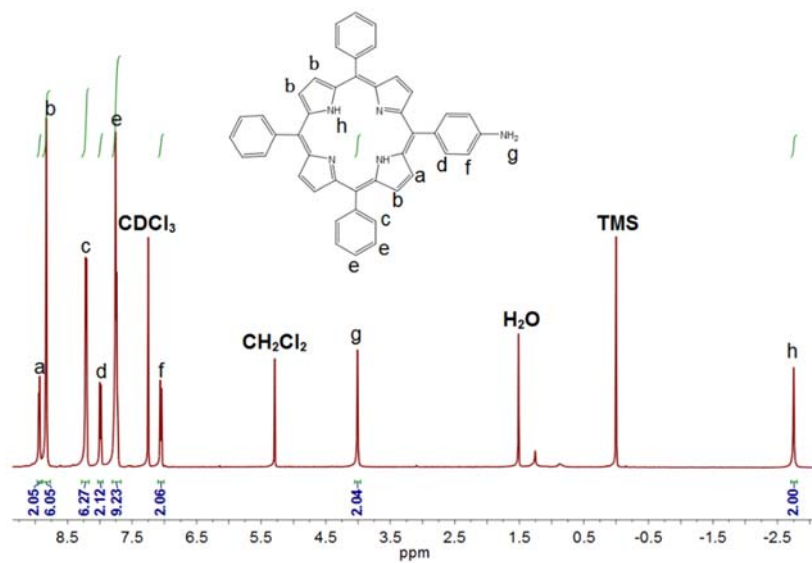

Fig. S3 <sup>1</sup>H NMR spectrum of TPP-NH<sub>2</sub>.

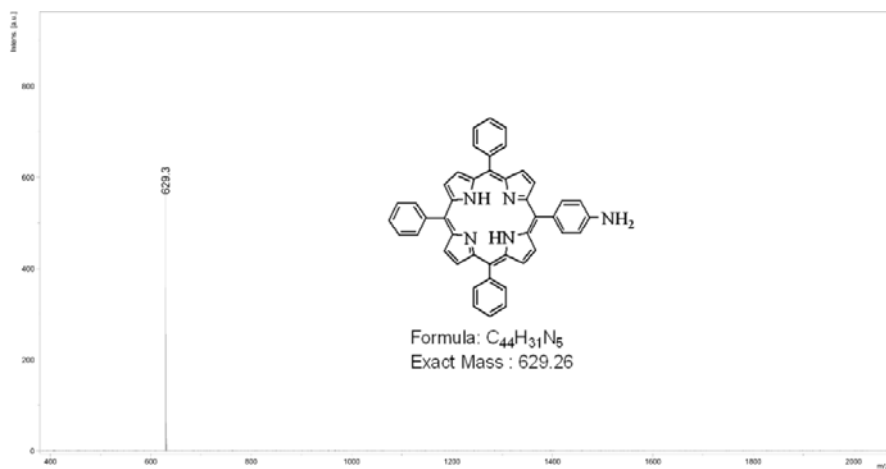

Fig. S4 MALDI-TOF MS of TPP-NH<sub>2</sub>.

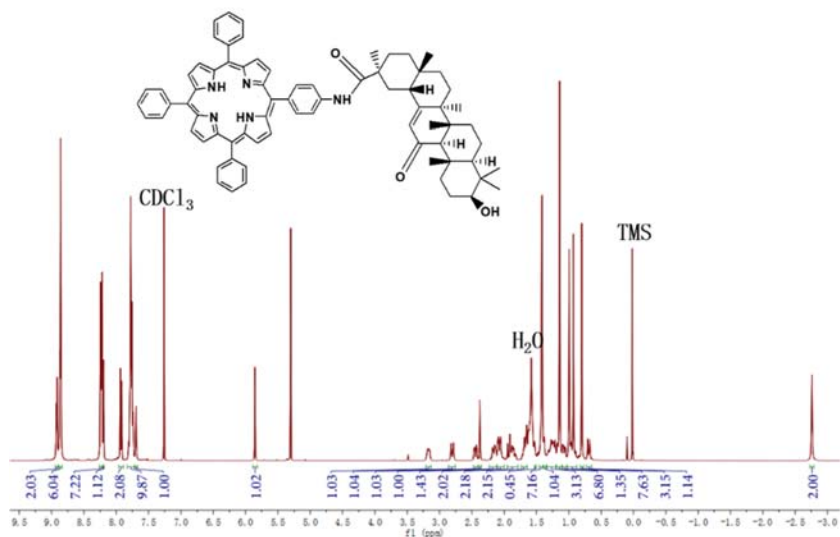

Fig. S5  $^1\text{H}$  NMR spectrum of TPP-GA.

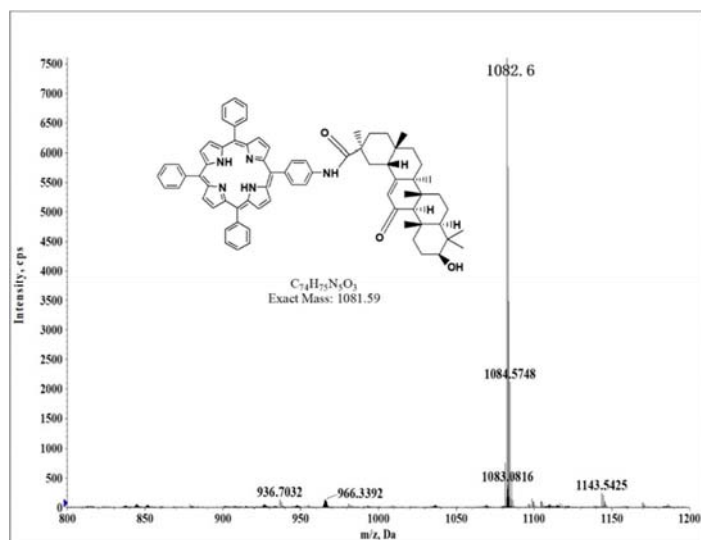

Fig. S6 MALDI-TOF MS of TPP-GA.

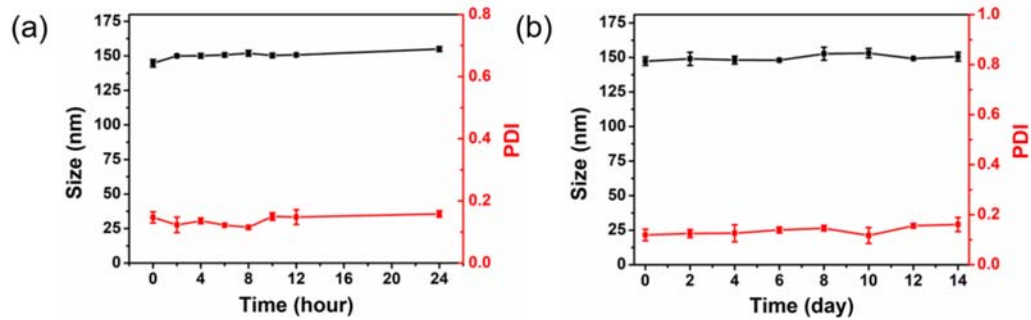

**Fig. S7** Time-dependent changes of the diameter and PDI of TPP-GA NPs in (a) PBS with 10% FBS and (b) aqueous solution.

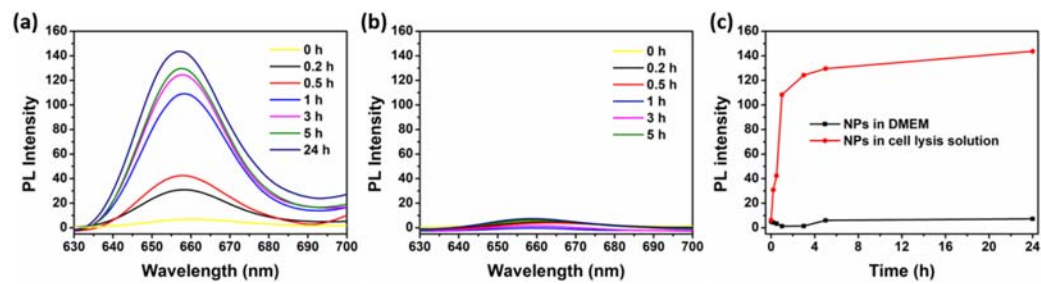

**Fig. S8** Time-dependent PL intensity of TPP-GA NPs (5  $\mu$ M) in (a) cell lysis solution and (b) DMEM. (c) The PL intensity at 657 nm of TPP-GA NPs (5  $\mu$ M) in cell lysis solution and DMEM.

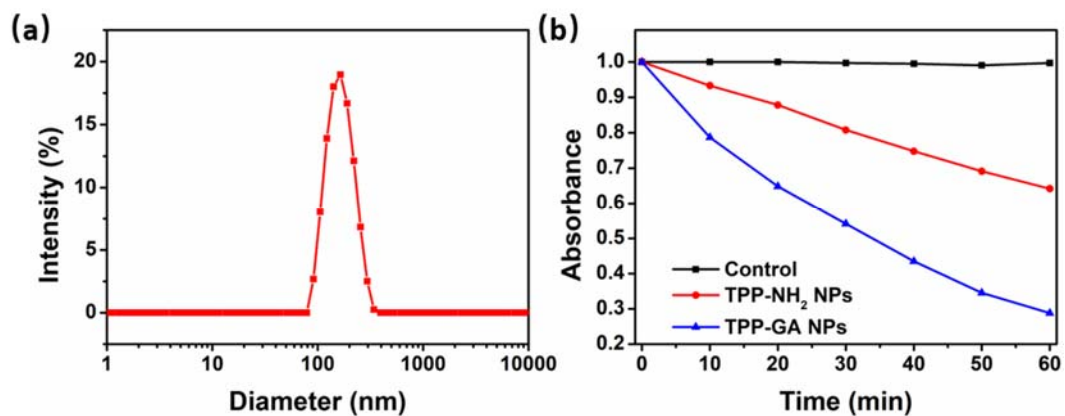

**Fig. S9** (a) DLS data of TPP NPs. (b) ROS generation of TPP-GA NPs and TPP NPs detected by ABMDMA. The concentration is both 10  $\mu$ M.

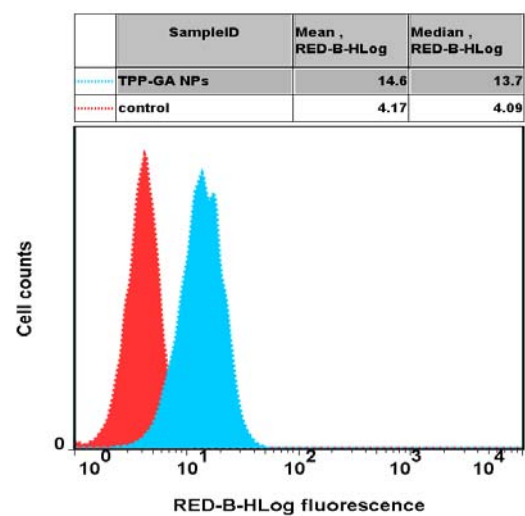

**Fig. S10** Flow cytometry of TPP-GA NPs (50  $\mu$ M) and control group in HeLa cells.

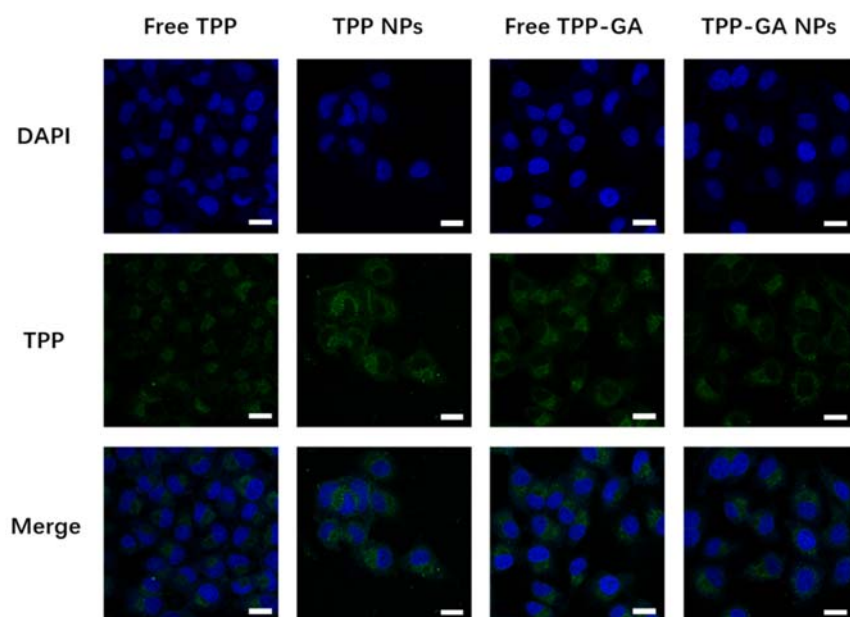

**Fig. S11** Cellular uptake images of free TPP, TPP NPs, free TPP-GA and TPP-GA NPs in HeLa cells. Concentration: 10  $\mu$ M. Scale bar: 20  $\mu$ m.

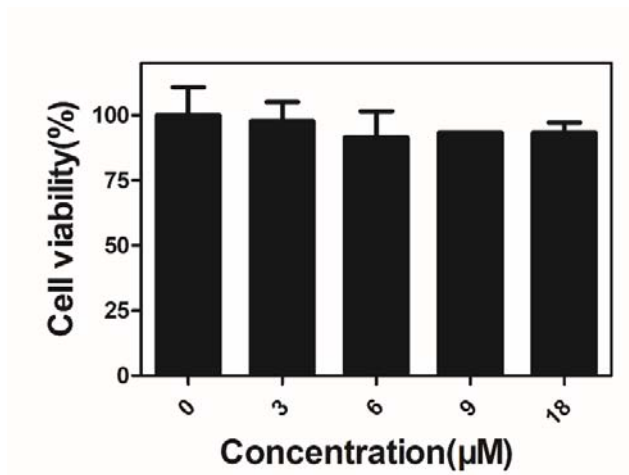

**Fig. S12** Cell viabilities of HeLa cells incubated with various concentration of GA for 72 h with irradiation (620 nm, 12 mW/cm<sup>2</sup>).

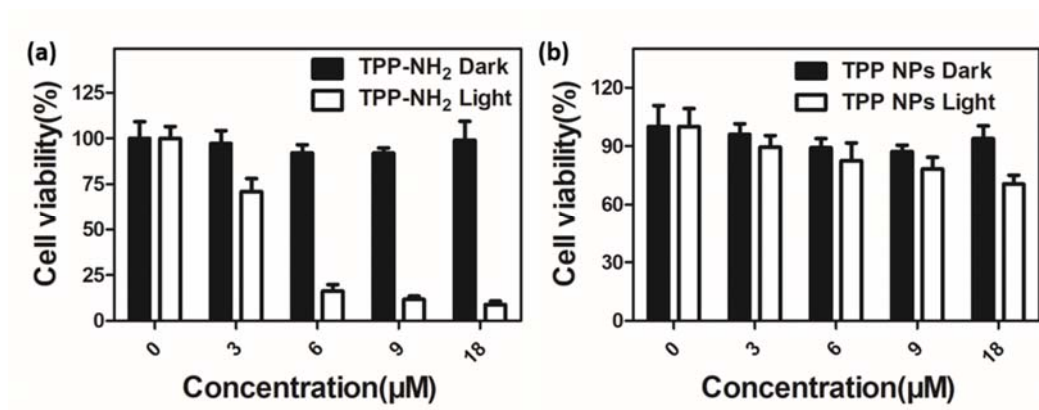

**Fig. S13** Cell viabilities of HeLa cells incubated with various concentrations of (a) free TPP and (b) TPP NPs for 72 h with or without irradiation (620 nm, 12 mW/cm<sup>2</sup>).

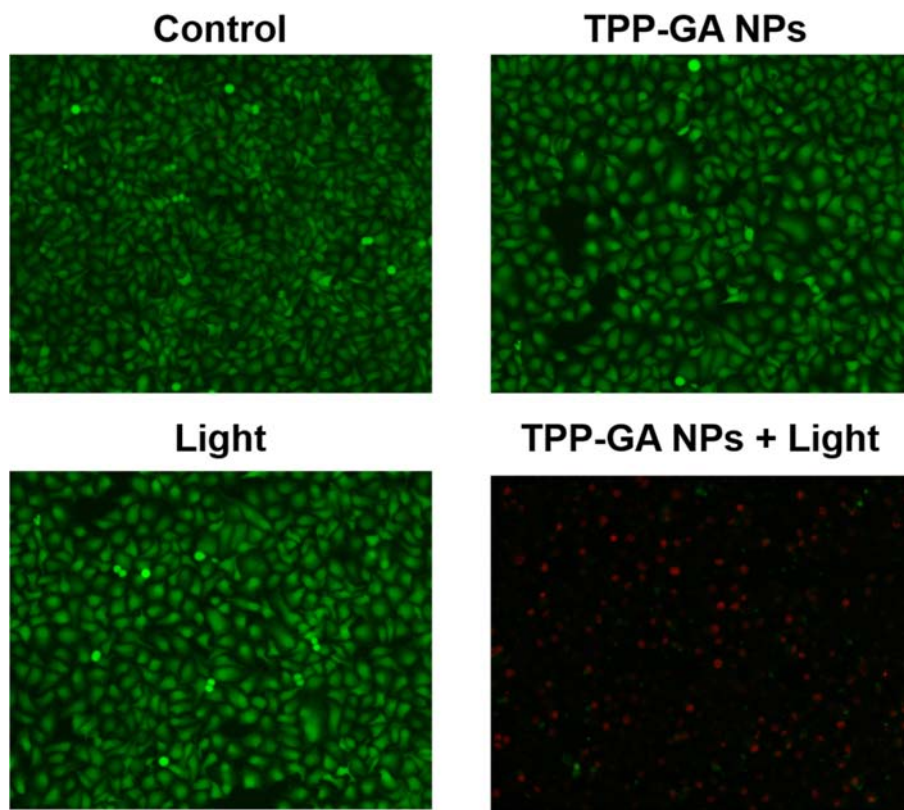

**Fig. S14** Live/dead staining of HeLa cells.
